# Supplementary material
Source: bioRxiv or medRxiv preprint supplement (https://www.biorxiv.org/highwire/filestream/81809/field_highwire_adjunct_files/4/266668-3.pdf)

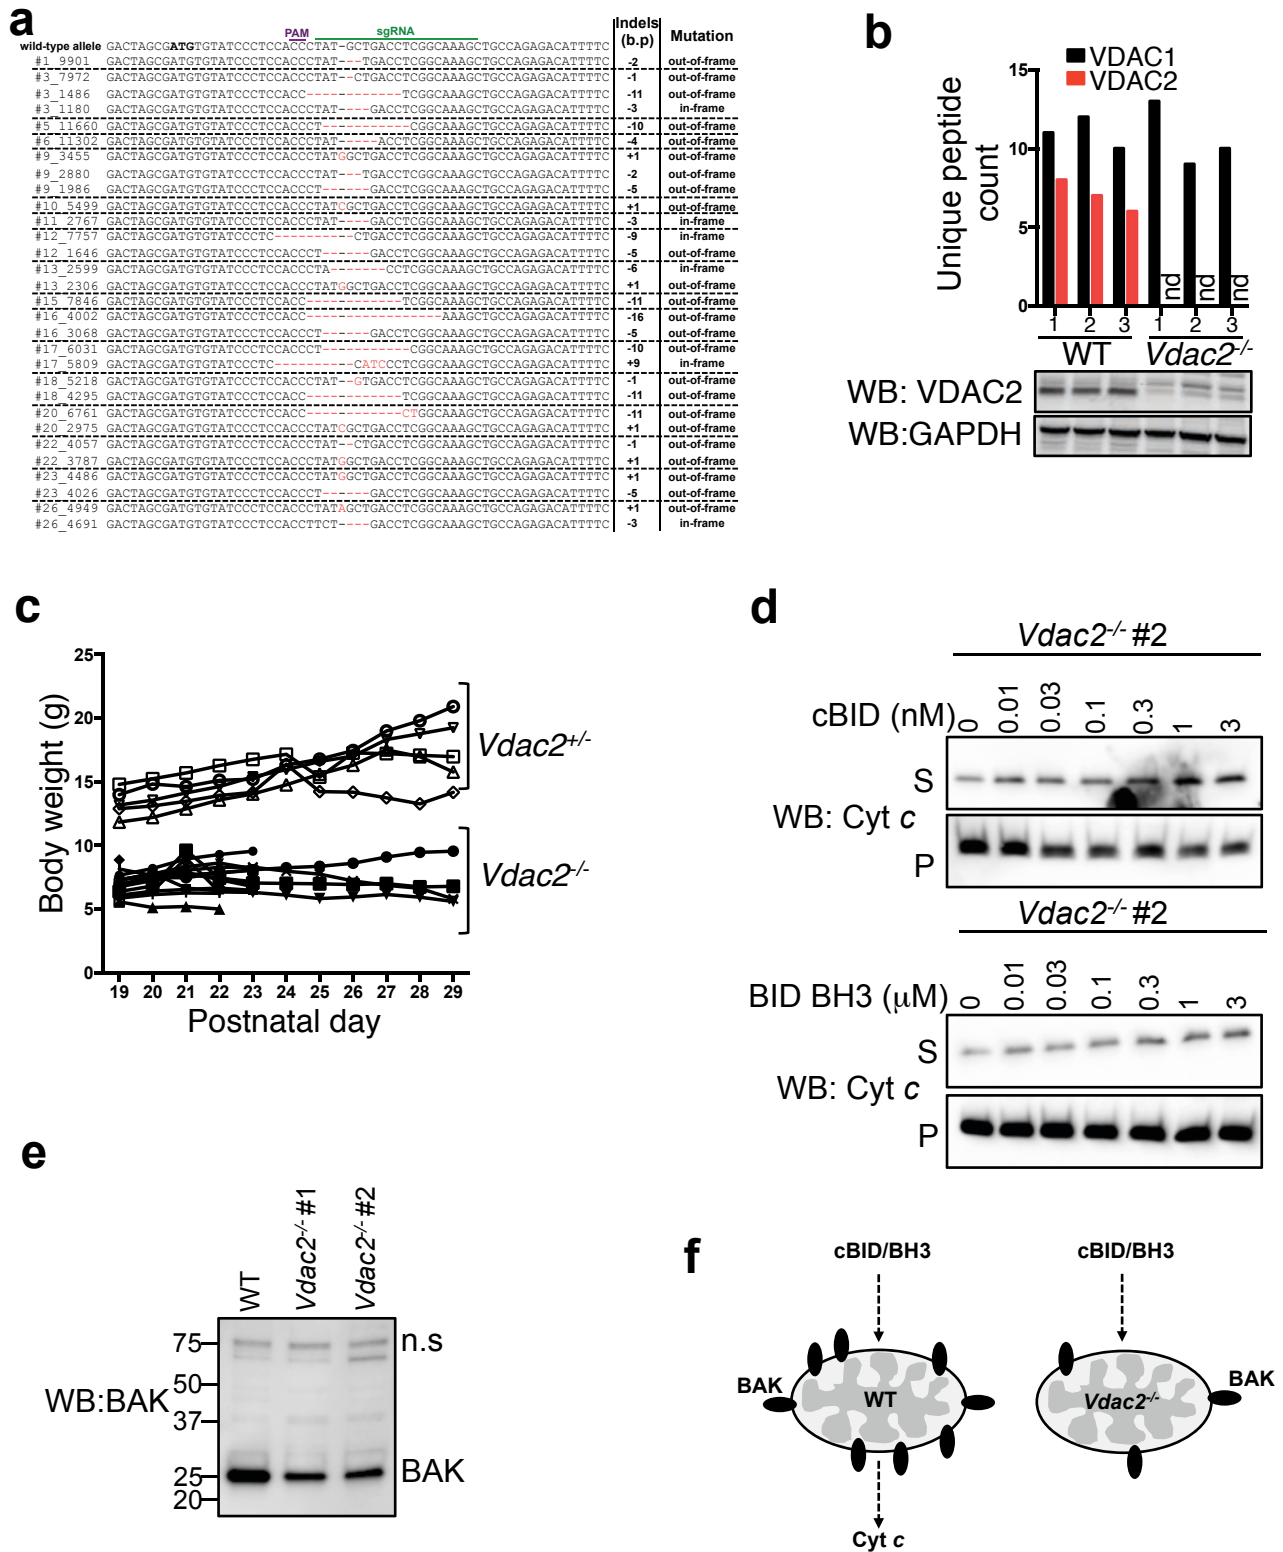

Supplement: Supplementary file [file 266668-3.pdf]
